# Supplementary material for: Defect modulation and luminescence improvement of Mn4+-activated La(Mg, Nb)O3 phosphor with improved stability for plant cultivation
Source: Royal Society of Chemistry journal article supplement (doi:10.1039/d1tc04992e), 2022-01-01
Supplement: d1tc04992e1.pdf [file d1tc04992e1.pdf]

# Defect modulation and luminescence improvement of Mn<sup>4+</sup>- activated La(Mg,Nb)O<sub>3</sub> phosphor with improved stability for plant cultivation

Quan Liu,<sup>a</sup> Zhuo Chen,<sup>a</sup> Xinhe Chen,<sup>a</sup> Pengyu Chen,<sup>a</sup> Yi Zhu,<sup>a</sup> Shuo Liu,<sup>a</sup> Kai Yang,<sup>a</sup> Bo Wei,<sup>\*a</sup>

Zhenyu Liu,<sup>\*b</sup> Ka-Leung Wong,<sup>\*c</sup>

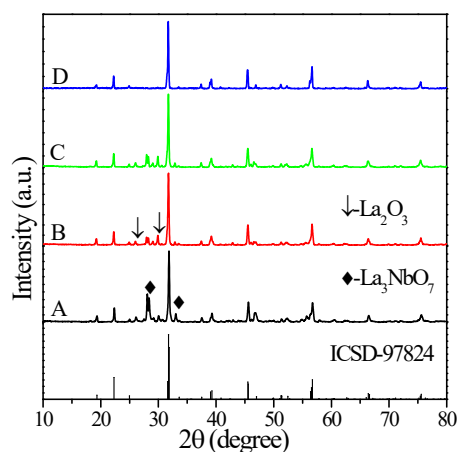

Fig. S1 XRD patterns of the LMN:Mn<sup>4+</sup> samples prepared using different manganese sources A:

No manganese; B: MnO<sub>2</sub>; C: MnCO<sub>3</sub>; D: KMnO<sub>4</sub>

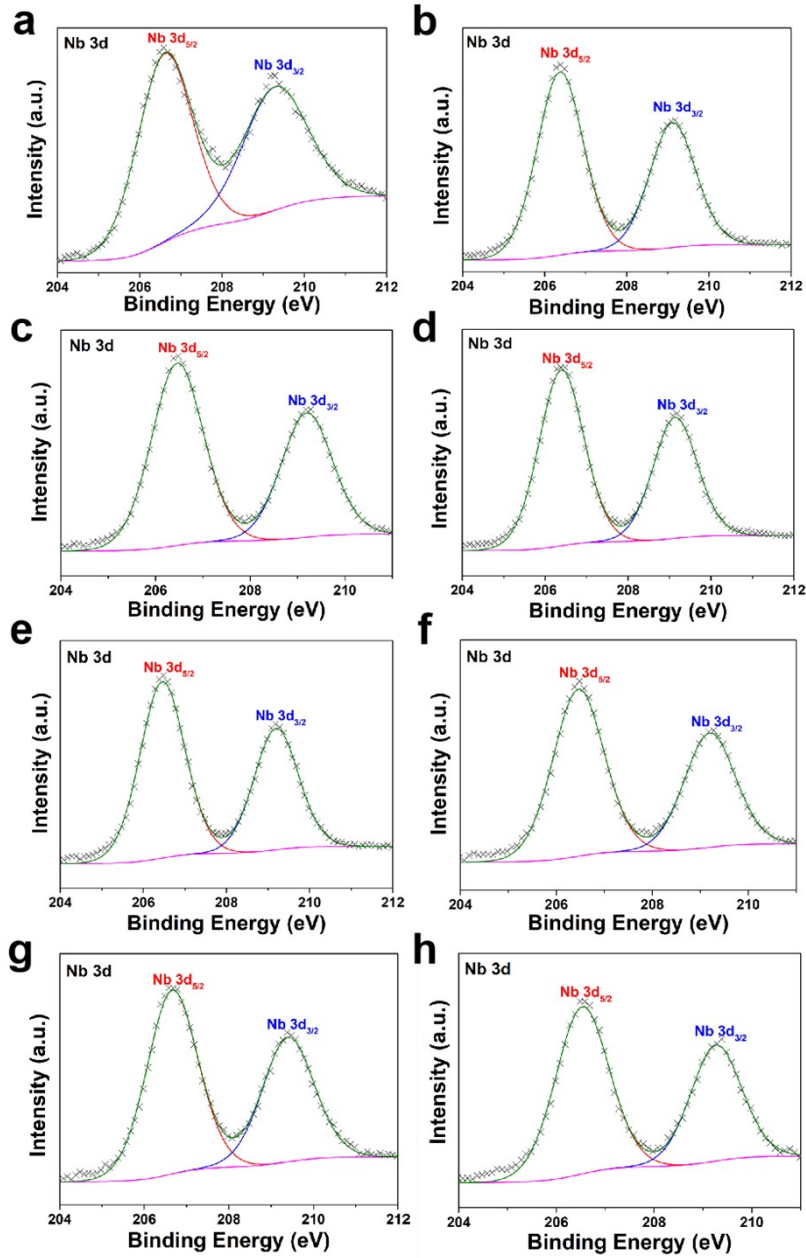

Fig. S2 (a-h) Nb 3d XPS spectra of the  $\text{LaMg}_{0.66-x}\text{Nb}_{0.34}\text{O}_{3+\delta}:\text{Mn}^{4+}$  samples ( $x = -0.06, 0, 0.06, 0.12, 0.18, 0.24, 0.30, 0.36$ )

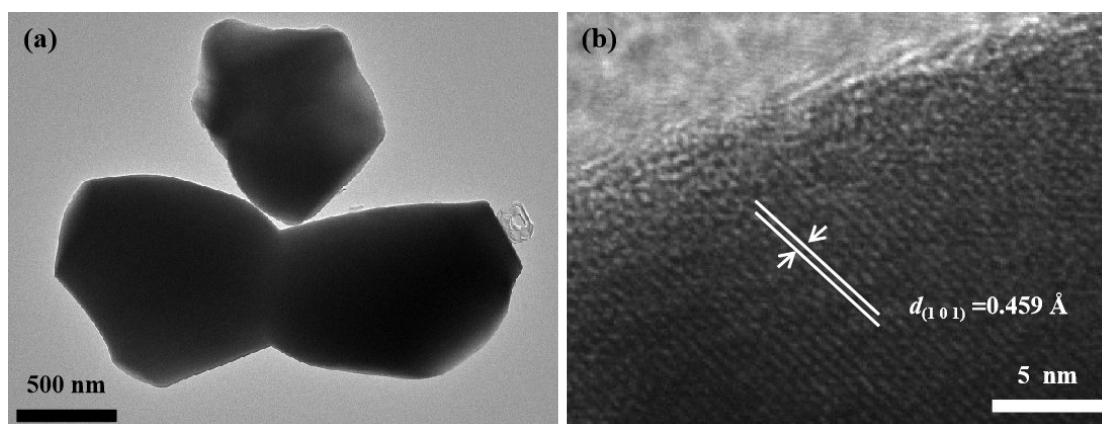

Fig. S3 TEM and HRTEM images of the sample  $\text{LaMg}_{0.42}\text{Nb}_{0.58}\text{O}_{3+\sigma}:\text{Mn}^{4+}$
